# Supplementary material for: Immunology repertoire study of pulmonary sarcoidosis T cells in CD4+, CD8+ PBMC and tissue
Source: PubMed Central journal article supplement (PMC5685688; doi:10.18632/oncotarget.20085), 2017-08-09
Supplement: oncotarget-08-89515-s001.pdf [file oncotarget-08-89515-s001.pdf]

# Immunology repertoire study of pulmonary sarcoidosis T cells in CD4+, CD8+ PBMC and tissue

## SUPPLEMENTARY MATERIALS

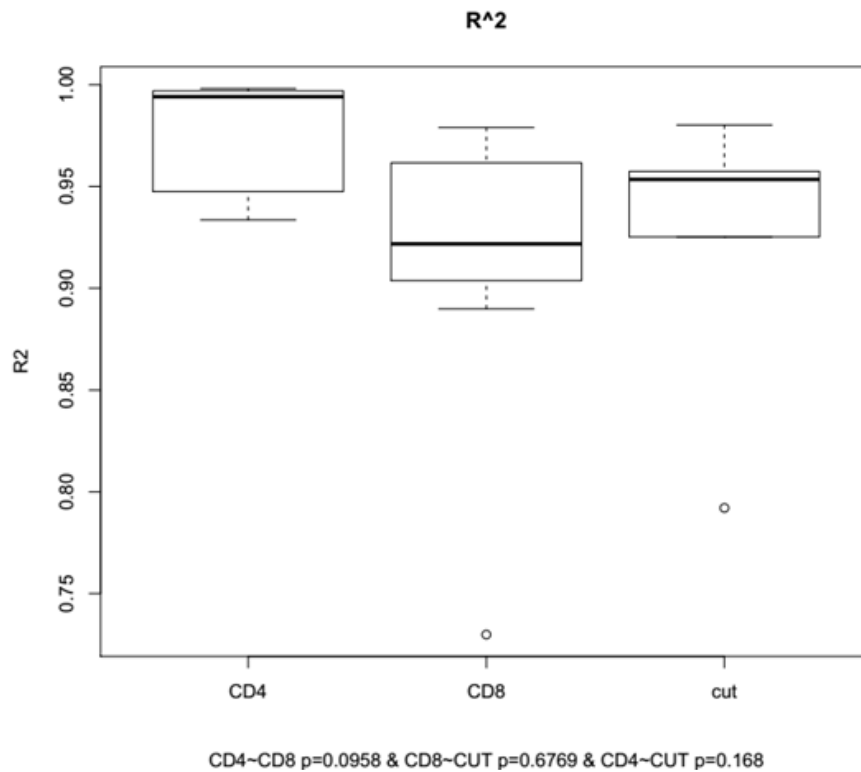

Supplimentary Figure 1: Gaussian distribution and the tissue group is worse fitted (no Sig.)

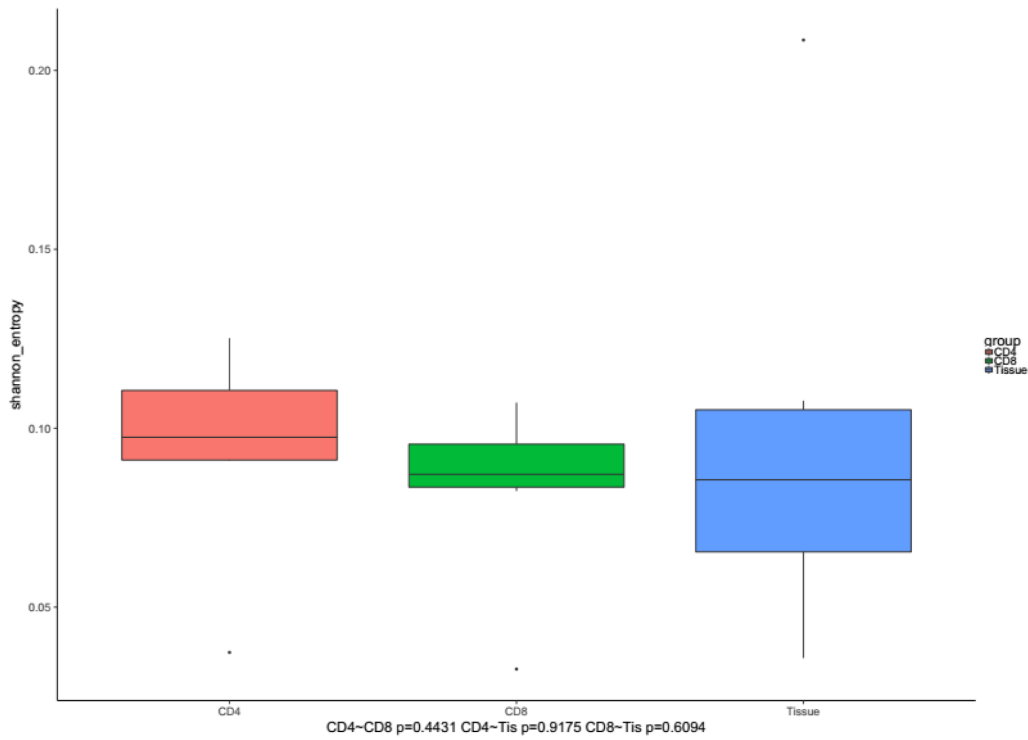

Supplementary Figure 2A: Shannon entropy of TRBV gene CDR3 length diversity

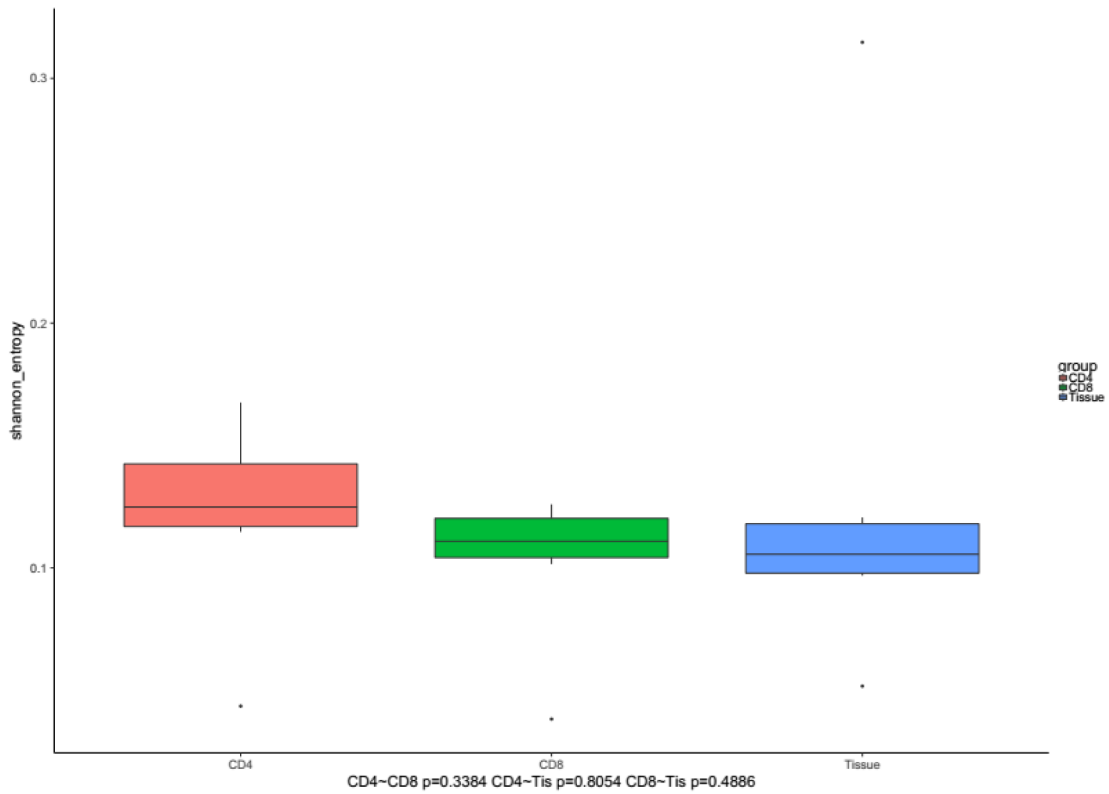

Supplementary Figure 2B: Shannon entropy of TRBV gene CDR3 sequence diversity

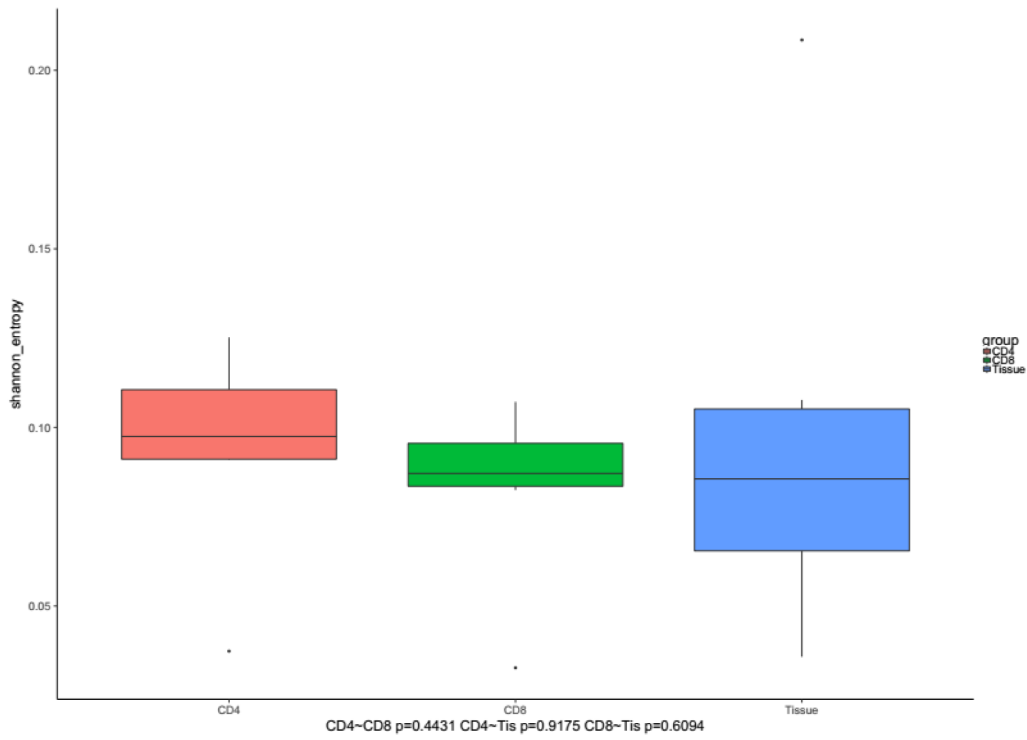

Supplementary Figure 2C: Shannon entropy of TRBV gene CDR3 length diversity

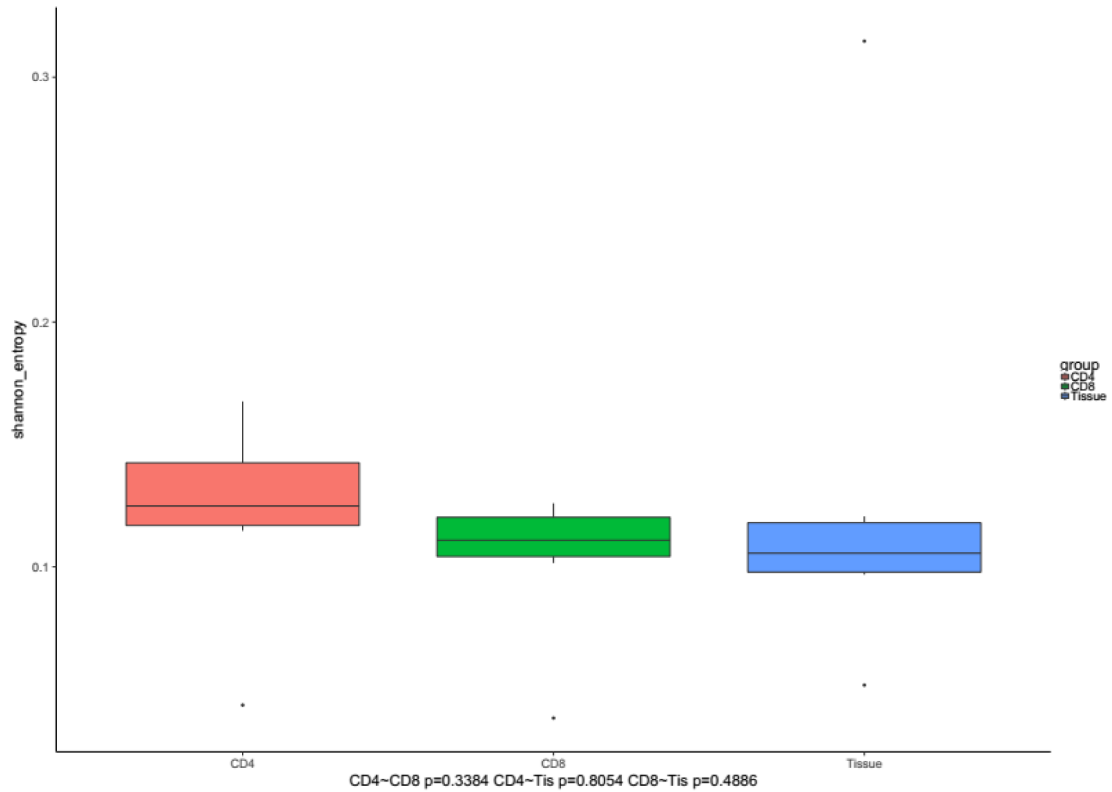

Supplementary Figure 2D: Shannon entropy of TRBV gene CDR3 sequence diversity

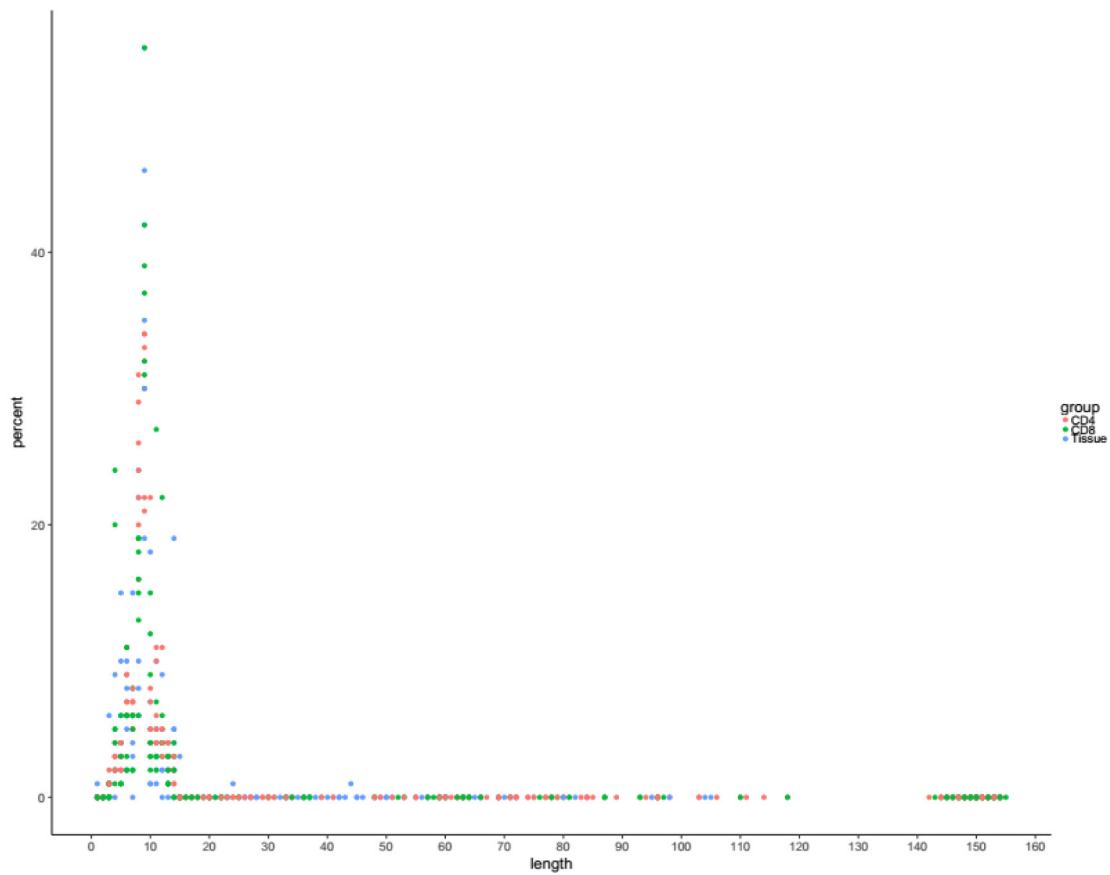

Supplementary Figure 3A: TRBV CDR3 length distribution of CD4+ group, CD8 group and tissue group.

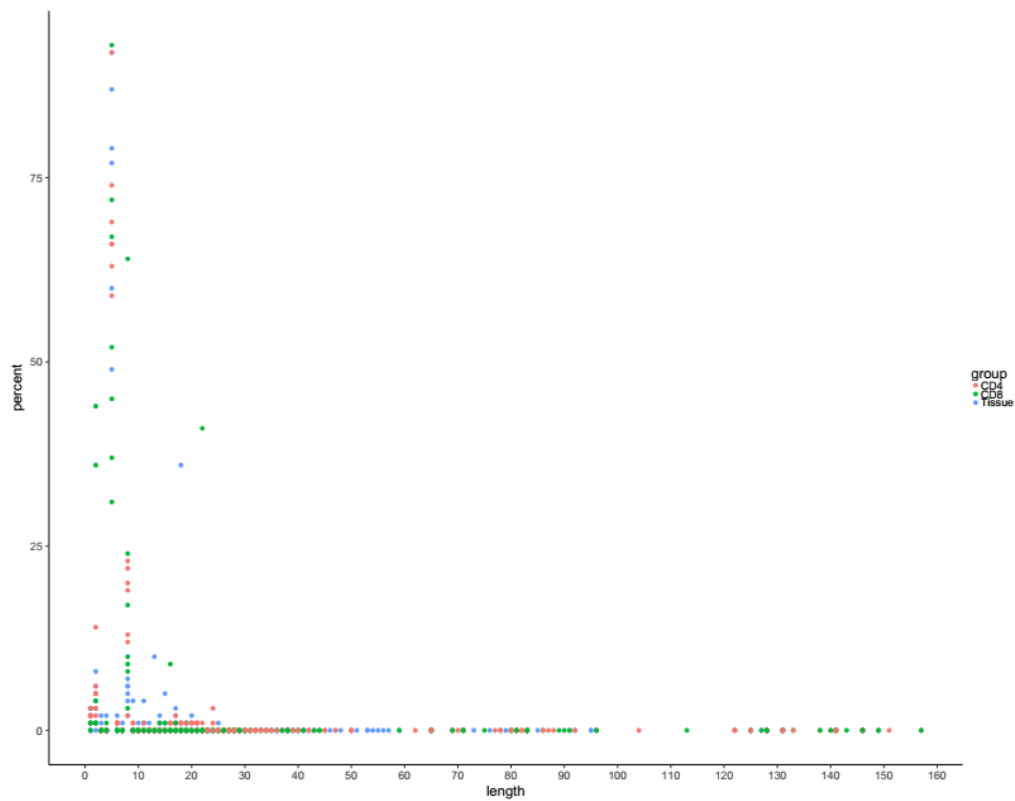

Supplementary Figure 3B: TRBJ CDR3 length distribution of CD4+ group, CD8 group and tissue group.

### Independent-Samples Kruskal-Wallis Test

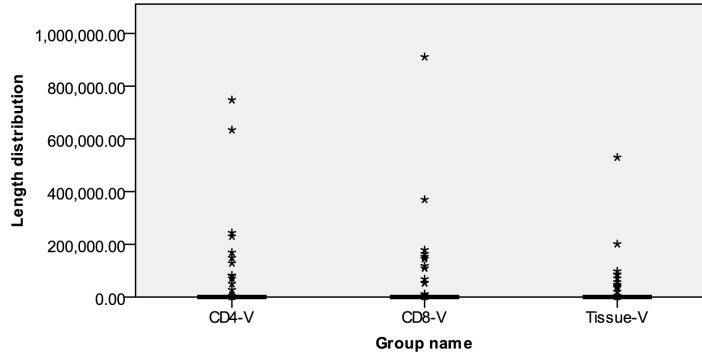

|                                |       |
|--------------------------------|-------|
| Total N                        | 463   |
| Test Statistic                 | 7.416 |
| Degrees of Freedom             | 2     |
| Asymptotic Sig. (2-sided test) | .025  |

1. The test statistic is adjusted for ties.

### Supplementary Figure 4A: TRBV CDR3 length distribution analysis;

### Independent-Samples Kruskal-Wallis Test

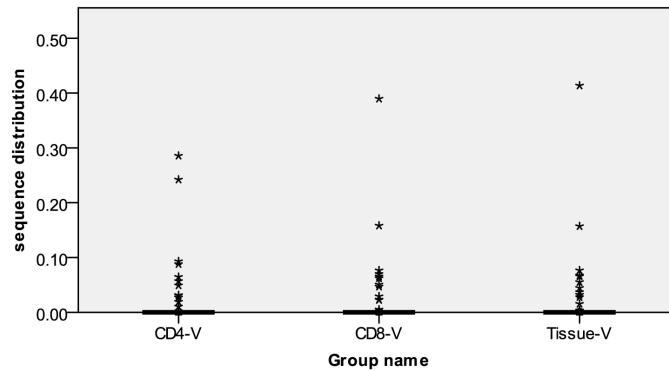

|                                |       |
|--------------------------------|-------|
| Total N                        | 463   |
| Test Statistic                 | 8.505 |
| Degrees of Freedom             | 2     |
| Asymptotic Sig. (2-sided test) | .014  |

1. The test statistic is adjusted for ties.

### Supplementary Figure 4B: TRBV CDR3 sequence distribution analysis.

### Independent-Samples Kruskal-Wallis Test

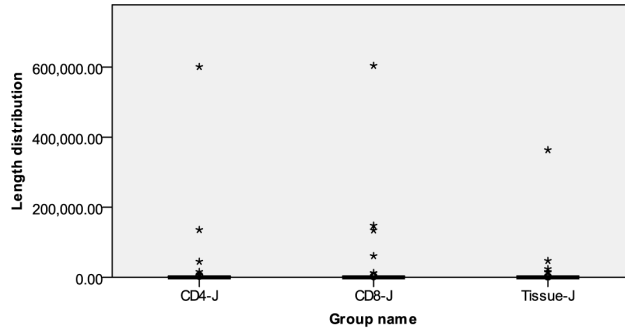

|                                       |      |
|---------------------------------------|------|
| <b>Total N</b>                        | 215  |
| <b>Test Statistic</b>                 | .398 |
| <b>Degrees of Freedom</b>             | 2    |
| <b>Asymptotic Sig. (2-sided test)</b> | .820 |

1. The test statistic is adjusted for ties.
2. Multiple comparisons are not performed because the overall test does not show significant differences across samples.

### Supplementary Figure 4C: TRBJ CDR3 Length distribution analysis.

### Independent-Samples Kruskal-Wallis Test

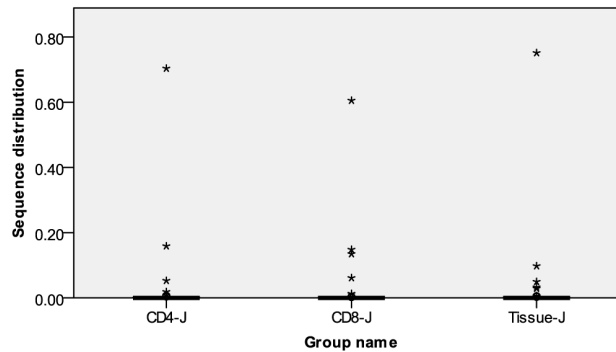

|                                       |       |
|---------------------------------------|-------|
| <b>Total N</b>                        | 215   |
| <b>Test Statistic</b>                 | 4.844 |
| <b>Degrees of Freedom</b>             | 2     |
| <b>Asymptotic Sig. (2-sided test)</b> | .089  |

1. The test statistic is adjusted for ties.
2. Multiple comparisons are not performed because the overall test does not show significant differences across samples.

### Supplementary Figure 4D. TRBJ CDR3 sequence distribution analysis;
